# Supplementary material
Source: MDPI journal article supplement (https://www.mdpi.com/2813-2564/1/1/3)
Supplement: s1 [file s1 › Supplementary Figure S1.pdf]

Tetz V. Tetz G. Novel cell receptor system of eukaryotes formed by previously unknown nucleic acid-based receptors.

Supplementary Figure S1. Removal of cell surface-bound DNA and RNA molecules with nucleases.

A

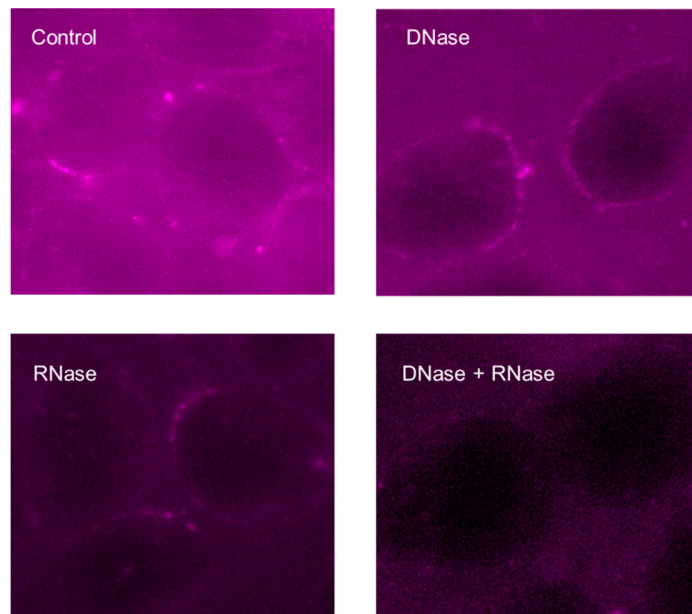

B

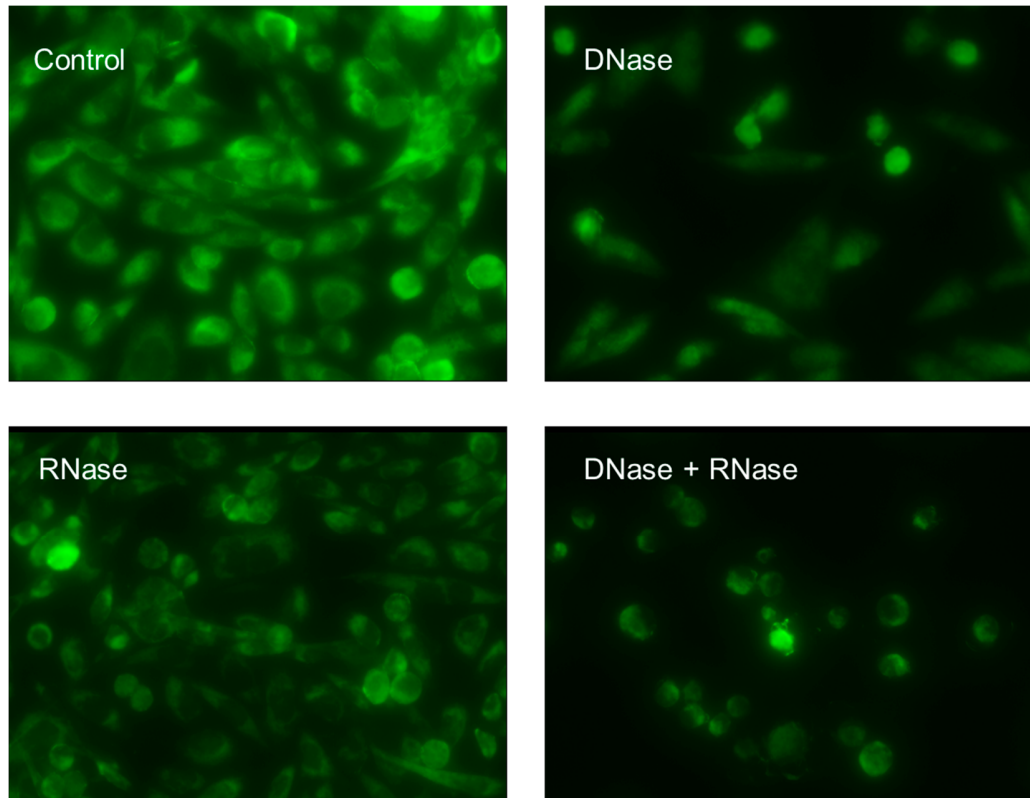

(A) Red fluorescence denotes cell surface-bound DNA and RNA of CHO cells stained with the propidium iodide. (B) Green fluorescence denotes cell surface-bound DNA and RNA of Vero cells stained with the membrane permeable SYTO 9.
