# Supplementary material
Source: MDPI journal article supplement (https://www.mdpi.com/2813-2564/1/1/3)
Supplement: s1 [file s1 › Supplementary Figure S2.pdf]

Tetz V. Tetz G. Novel cell receptor system of eukaryotes formed by previously unknown nucleic acid-based receptors.

Supplementary Figure S2. Absence of RNase A internalization in Vero cells.

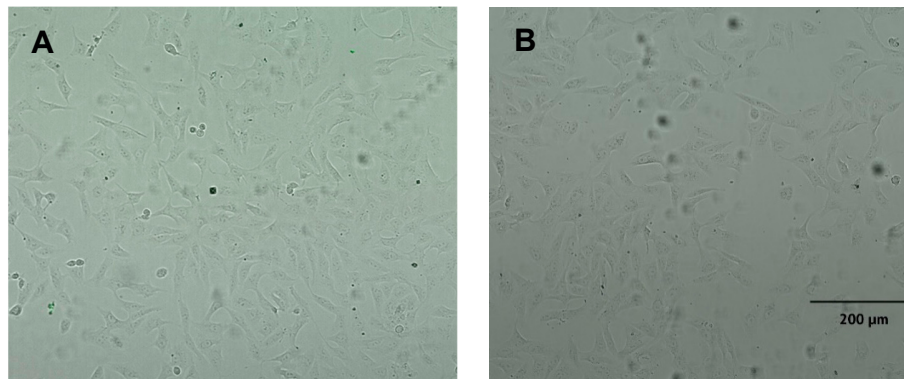

Vero cells were treated with FITC labeled RNase A (50  $\mu\text{g/ml}$ ) for 30 min, after which RNase I was washed out and fluorescence was measured (A) immediately , or (B) after 24 h of growth
