# Supplementary material
Source: MDPI journal article supplement (https://www.mdpi.com/2813-2564/1/1/3)
Supplement: s1 [file s1 › Supplementary Figure S3.pdf]

Tetz V. Tetz G. Novel cell receptor system of eukaryotes formed by previously unknown nucleic acid-based receptors.

Supplementary Figure S3. Effect of primary TezRs destruction on cell number and multipolar morphotypes vs bipolar morphotypes in 24h old culture of Vero cells

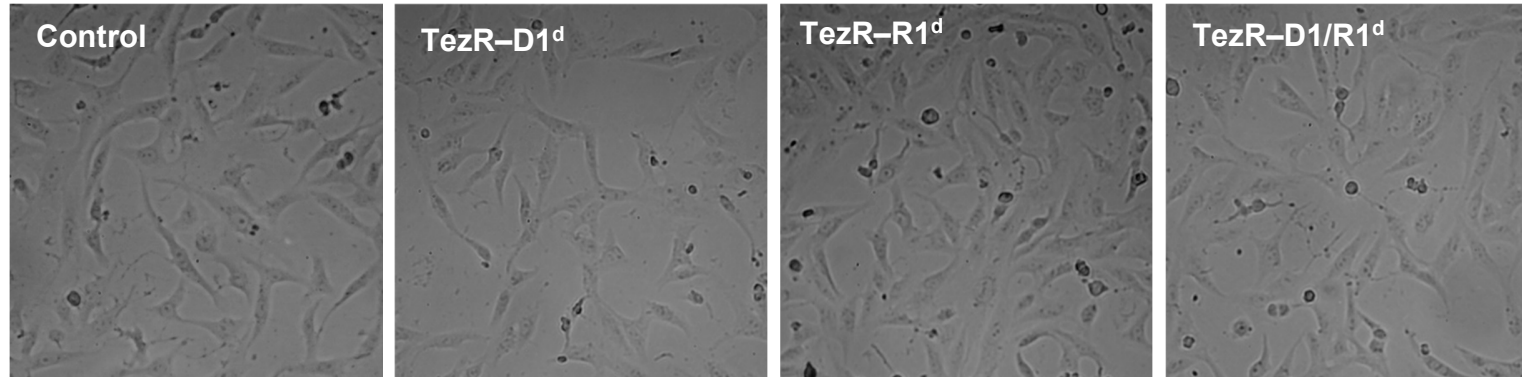

Morphology of 24h old TezR\_D1d, Vero TezR\_R1d, and TezR\_D1/R1d Vero cells following the treatment with nucleases as discussed in materials and methods was studied by light microscopy. Cells were left treated with vehicle for negative control. Similar cellular morphology was observed in five independent experiments. Magnification: 10x.
