# Supplementary material
Source: MDPI journal article supplement (https://www.mdpi.com/2813-2564/1/1/3)
Supplement: s1 [file s1 › Supplementary Figure S4.pdf]

Tetz V. Tetz G. Novel cell receptor system of eukaryotes formed by previously unknown nucleic acid-based receptors.

Supplementary Figure S4. Absence of RNase A internalization in *Candida albicans*.

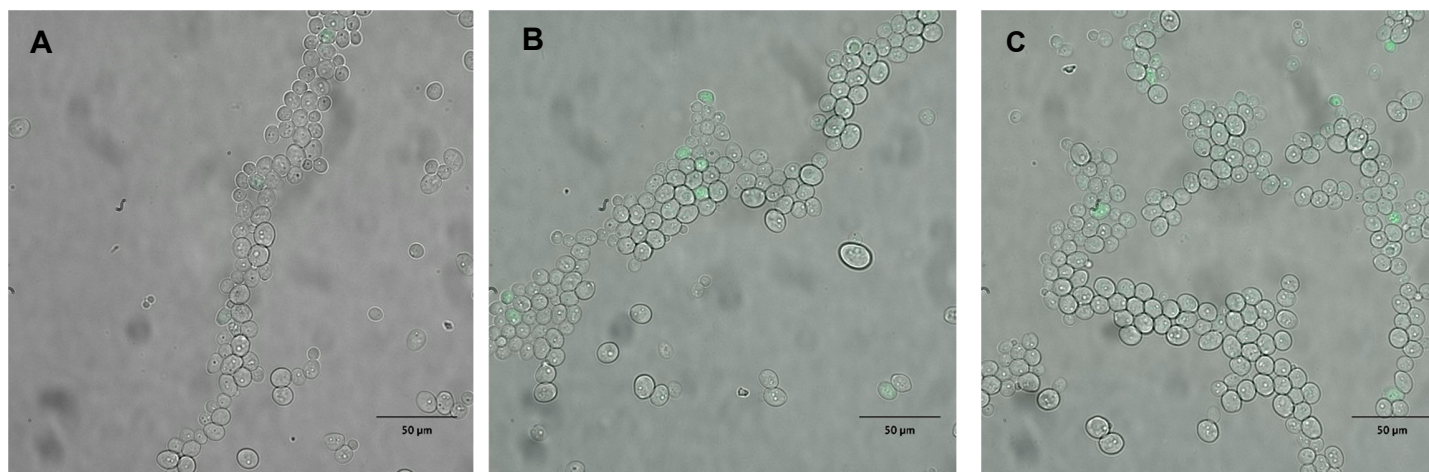

*C. albicans* was (A) treated with FITC conjugated RNase A (50 µg/ml) for 1 h and fluorescence was measured immediately, (B) treated with FITC conjugated RNase A (100 µg/ml) for 1h and fluorescence was measured after 6 h of growth, (C) cultivated on agar for 24 h, supplemented with FITC conjugated RNase A (50 µg/ml).
