# Supplementary material
Source: MDPI journal article supplement (https://www.mdpi.com/2813-2564/1/1/3)
Supplement: s1 [file s1 › Supplementary Table S1.pdf]

Tetz V. Tetz G. Novel cell receptor system of eukaryotes formed by previously unknown nucleic acid-based receptors.

Supplementary Table S1. Effect of primary TezRs destruction on *C. albicans* size

| <b><i>C. albicans</i></b> | <b>Cell size (px2)</b> | <b>SD</b>   | <b>p</b> |
|---------------------------|------------------------|-------------|----------|
| Control                   | 18.5375                | 5.95947764  |          |
| TezR-D1 <sup>d</sup>      | 18.43539498            | 4.807795282 | 0.944    |
| TezR-R1 <sup>d</sup>      | 16.86619718            | 4.760321403 | 0.253    |
| TezR-D1/R1 <sup>d</sup>   | 20.43693982            | 4.040025283 | 0.165    |
