# Supplementary material
Source: MDPI journal article supplement (https://www.mdpi.com/2813-2564/1/1/3)
Supplement: s1 [file s1 › Supplementary Table S2.pdf]

Tetz V. Tetz G. Novel cell receptor system of eukaryotes formed by previously unknown nucleic acid-based receptors.

Supplementary Table S2. MICs of tested reverse transcriptase inhibitors and integrase inhibitor on control *C. albicans*.

| Drug        | Concentration of drug in µg/mL |     |     |    |    |    |   |   |   |   |     |      |       |
|-------------|--------------------------------|-----|-----|----|----|----|---|---|---|---|-----|------|-------|
|             | 512                            | 256 | 128 | 64 | 32 | 16 | 8 | 4 | 2 | 1 | 0.5 | 0.25 | 0.125 |
| Etravirine  | +                              | +   | +   | +  | +  | +  | + | + | + | + | +   | +    | +     |
| Lamivudine  | +                              | +   | +   | +  | +  | +  | + | + | + | + | +   | +    | +     |
| Tenofovir   | +                              | +   | +   | +  | +  | +  | + | + | + | + | +   | +    | +     |
| Abacavir    | +                              | +   | +   | +  | +  | +  | + | + | + | + | +   | +    | +     |
| Raltegravir | +                              | +   | +   | +  | +  | +  | + | + | + | + | +   | +    | +     |

\* “+” was used to mark the presence of bacterial growth
