# Supplementary material
Source: MDPI journal article supplement (https://www.mdpi.com/2813-2564/1/1/3)
Supplement: s1 [file s1 › Supplementary Table S3.pdf]

Tetz V. Tetz G. Novel cell receptor system of eukaryotes formed by previously unknown nucleic acid-based receptors.

Supplementary Table S3. Effect of RTIs on control and *C. albicans* TezR\_R1<sup>d</sup> at 12h of growth

| Probe                     | Experiment #1 | Experiment #2 | Experiment #3 | Mean     | SD       | p      | Comment                                   |
|---------------------------|---------------|---------------|---------------|----------|----------|--------|-------------------------------------------|
| Control                   | 1.34          | 1.2           | 1.12          | 1.22     | 0.090921 |        |                                           |
| Control+ETR               | 1.828         | 2.095         | 1.964         | 1.962333 | 0.109009 |        |                                           |
| Control+LMV               | 1.832         | 1.948         | 2.21          | 1.996667 | 0.158108 |        |                                           |
| Control+TDF               | 1.462         | 1.651         | 1.229         | 1.447333 | 0.172593 |        |                                           |
| TezR-R1 <sup>d</sup>      | 1.938         | 1.902         | 1.743         | 1.861    | 0.084723 |        |                                           |
| TezR-R1 <sup>d</sup> +ETR | 0.253         | 0.296         | 0.217         | 0.255333 | 0.032294 | <0.001 | Control+ETR vs TezR-R1 <sup>d</sup> +ETR  |
| TezR-R1 <sup>d</sup> +LMV | 0.155         | 0.186         | 0.133         | 0.158    | 0.021741 | 0.002  | Control+ LMV vs TezR-R1 <sup>d</sup> +LMV |
| TezR-R1 <sup>d</sup> +TDF | 0.485         | 0.547         | 0.414         | 0.482    | 0.054338 | 0.023  | Control+ TDF vs TezR-R1 <sup>d</sup> +TDF |
